# Supplementary material for: Pregnancy-specific glycoprotein 9 (PSG9), a driver for colorectal cancer, enhances angiogenesis via activation of SMAD4
Source: PubMed Central journal article supplement (PMC5308672; doi:10.18632/oncotarget.11146), 2016-08-09
Supplement: oncotarget-07-61562-s001.pdf [file oncotarget-07-61562-s001.pdf]

# Pregnancy-specific glycoprotein 9 (PSG9), a driver for colorectal cancer, enhances angiogenesis via activation of SMAD4

## SUPPLEMENTARY FIGURES AND TABLES

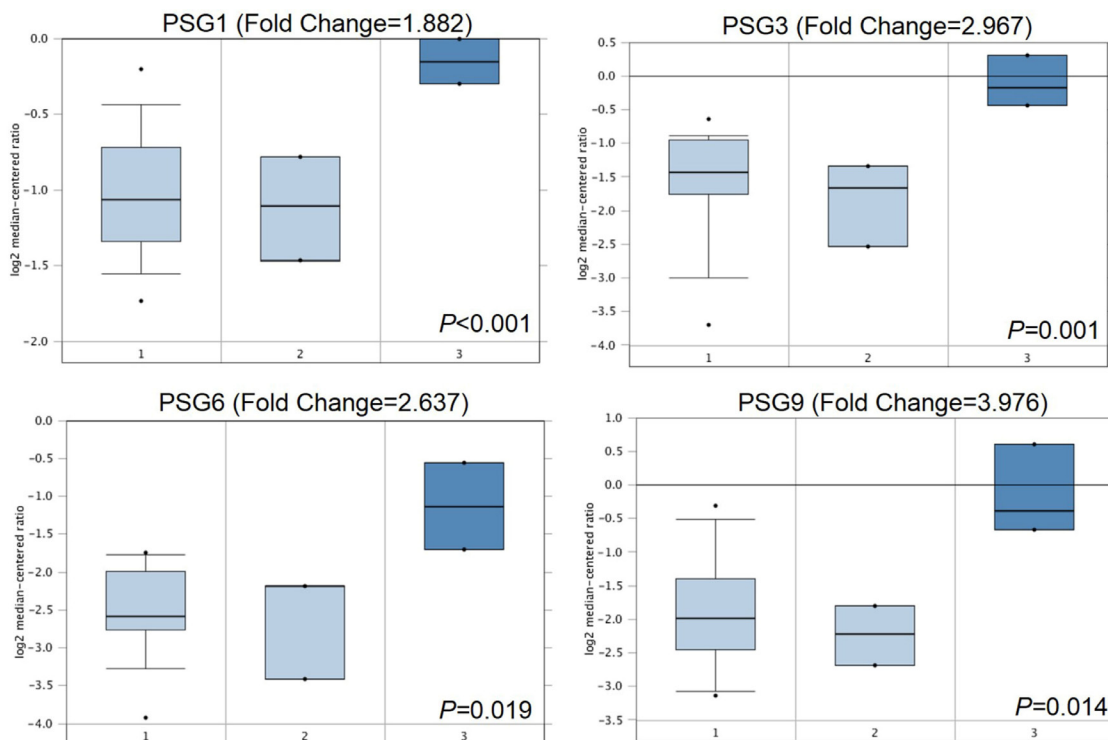

**Supplementary Figure S1:** The Oncomine microarray database (<https://www.oncomine.org>) was searched to analyze the mRNA expression of PSG1, PSG3, PSG6, or PSG9 in patients with CRC. 1, Colon tissues, n=19; 2, Rectal tissues, n=3; 3, Rectosigmoid adenocarcinoma, n=3.

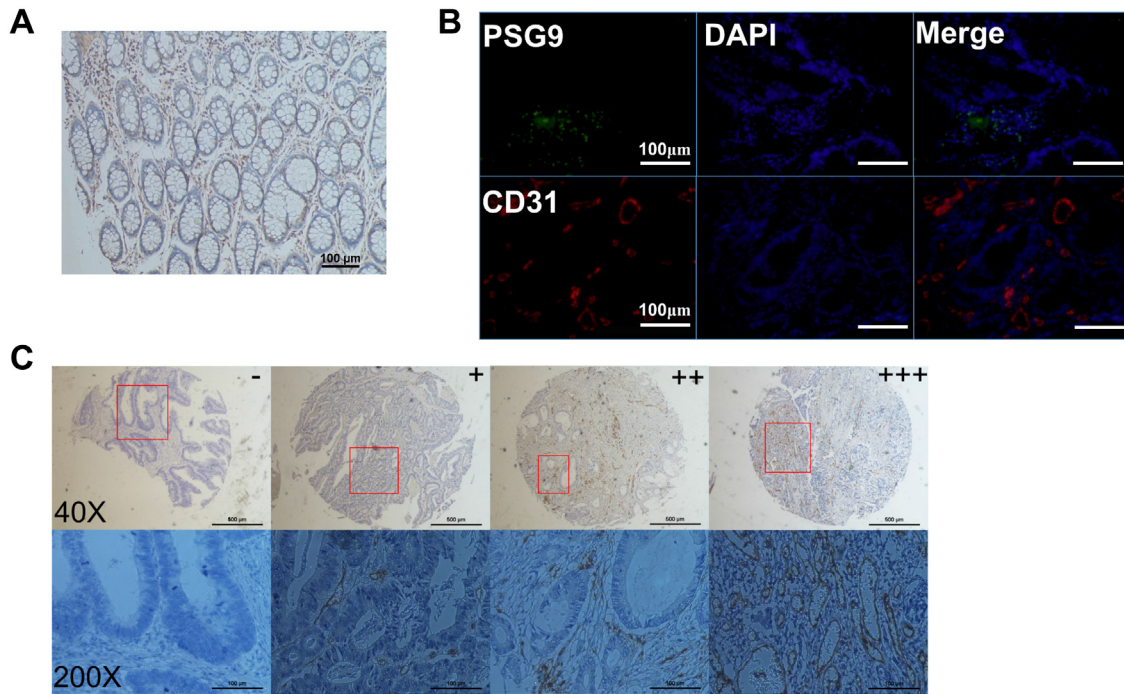

**Supplementary Figure S2: PSG9 are associated with micro-vessel density (MVD).** A. Immunohistochemical staining shows a relative low PSG9 expression in a paired normal CRC tissue section. B. Immunofluorescence (IF) staining for PSG9 and CD31 in CRC tissues. C. Representative images of negative (-), weak (+), moderate (++), and strong (+++) staining for CD31 in CRC tissues.

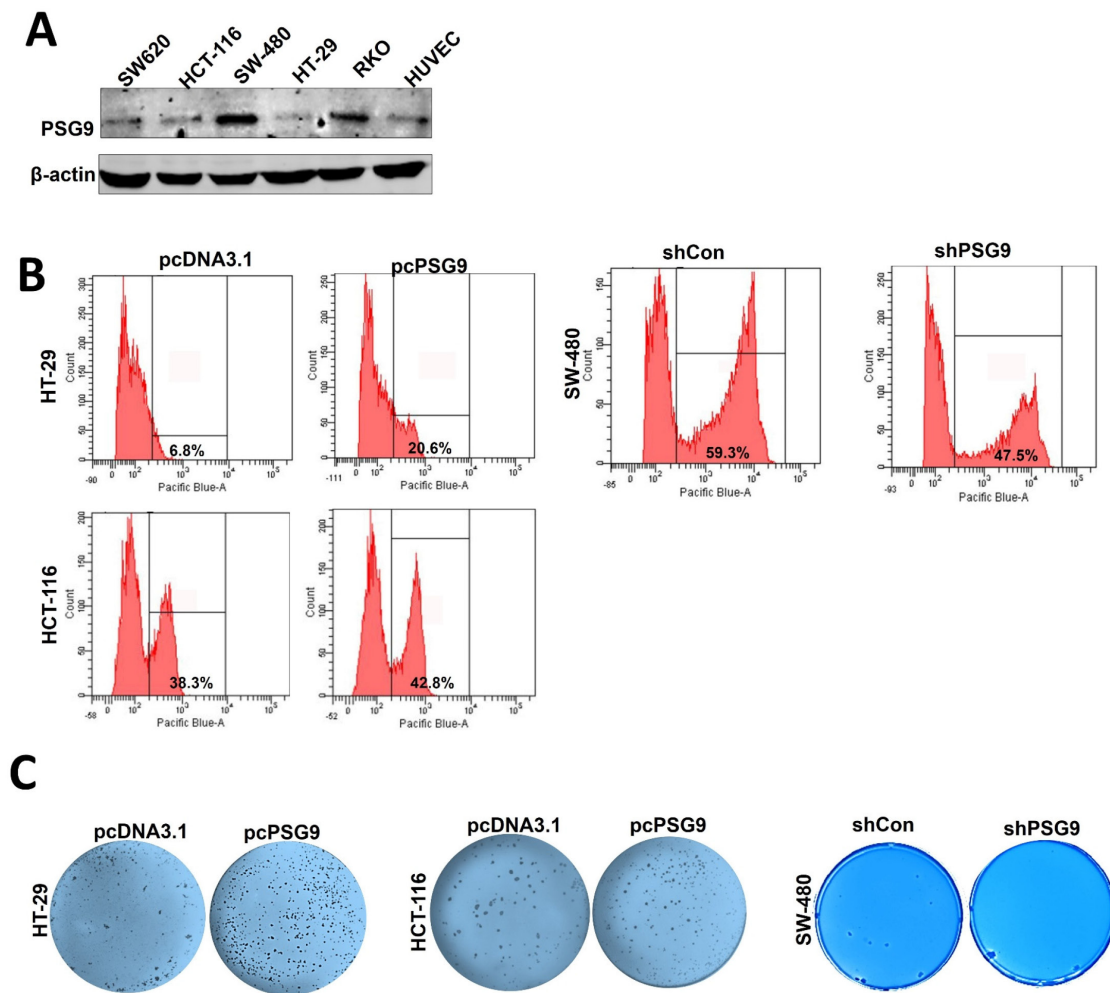

**Supplementary Figure S3: PSG9 promotes the proliferation of CRC cells.** A. Western blotting identified the expression of PSG9 in SW620, HCT-116, SW-480, HT-29, RKO, and HUVEC cells. B. Representative flow cytometry (FCM) images used to determine the proliferating cells by EdU assay. C. Colony formation assays determined the effect of PSG9 expression on the colony-forming ability of the cells.

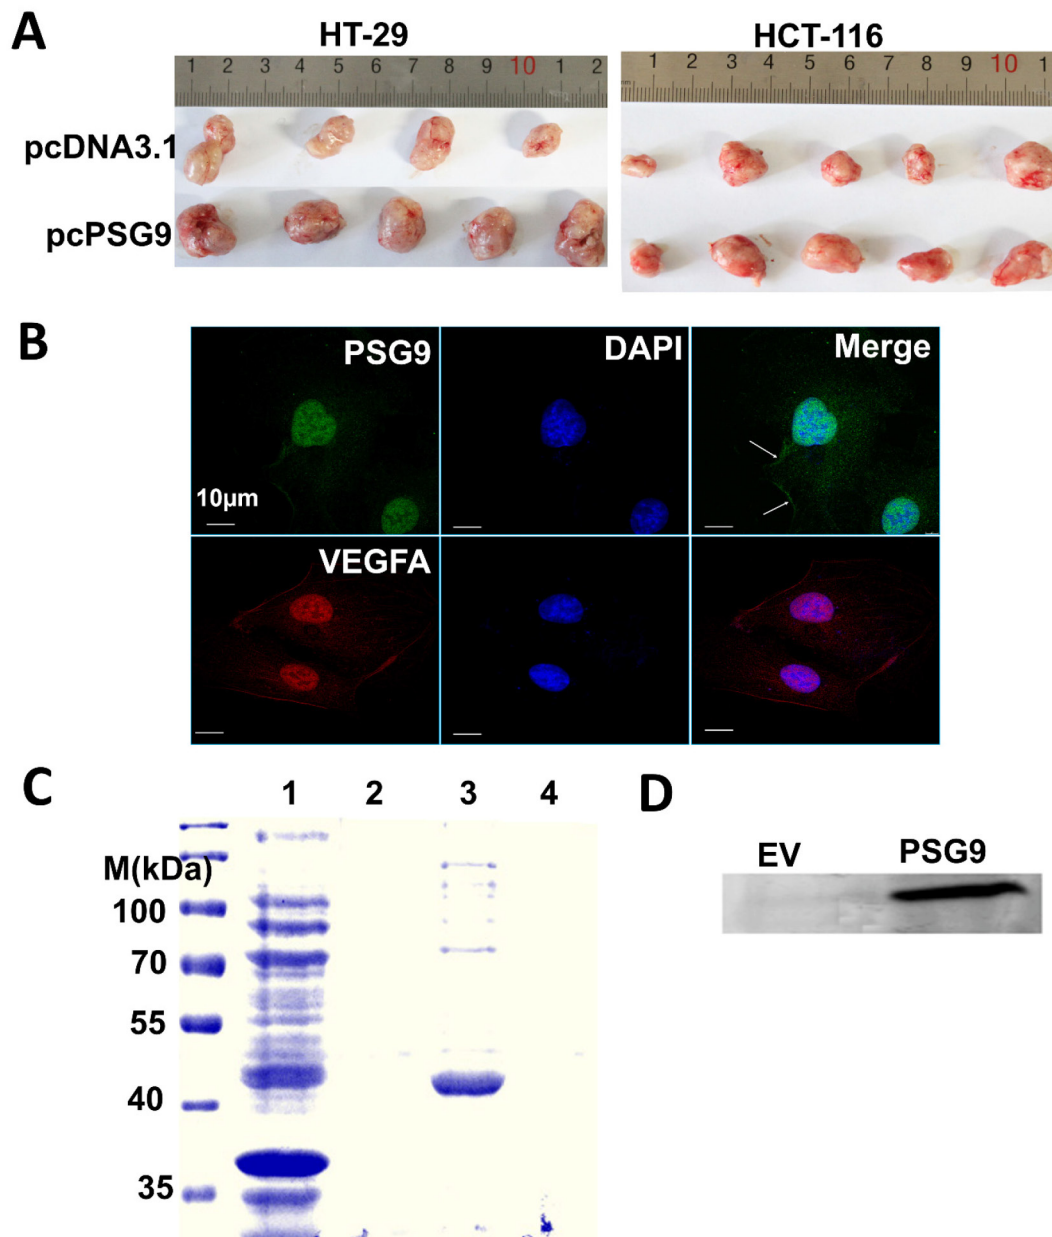

**Supplementary Figure S4: Tumor xenograft models of HT-29-pcDNA3.1, HT-29-pcPSG9, HCT-116-pcDNA3.1, and HCT-116-pcPSG9 cells and the prokaryotic expression of PSG9. A.** The tumors that formed in the mice. **B.** Immunofluorescence (IF) staining for PSG9 and VEGFA in HUVECs. **C.** Purified PSG9, elution by a concentration gradient of imidazole (1, pre-purified *E.coli* lysates; 2, 20 nM, 3, 40 nM, 4, 100 nM). **D.** Western blotting identified purified PSG9 proteins. EV, empty vector.

Supplementary Table S1: Serum PSG9 levels and basic clinical characteristics

|                                 | PSG9 levels (mean ± SD) (µg/ml) | P value |
|---------------------------------|---------------------------------|---------|
| <b>Healthy controls (n=125)</b> | 0.90±1.92                       |         |
| Sex                             |                                 |         |
| Male (n=56)                     | 0.78±1.43                       |         |
| Female (n=69)                   | 0.99±2.25                       | 0.320   |
| Age, years                      |                                 |         |
| <55 (n=86)                      | 1.00±2.19                       |         |
| ≥55 (n=39)                      | 0.68±1.13                       | 0.210   |
| <b>CRC(n=140)</b>               | 3.40±10.59                      |         |
| Sex                             |                                 |         |
| Male (n=72)                     | 2.02±3.56                       |         |
| Female (n=68)                   | 4.86±14.66                      | 0.830   |
| Age, years                      |                                 |         |
| <55 (n=42)                      | 1.96±6.56                       |         |
| ≥55 (n=98)                      | 4.03±11.88                      | 0.060   |
| Tumor size                      |                                 |         |
| ≤5 cm (n=31)                    | 1.11±1.77                       |         |
| >5 cm (n=88)                    | 4.81 ± 13.13                    | 0.037   |
| Missing (n=21)                  |                                 |         |
| Differentiation                 |                                 |         |
| Well (n=3)                      | 0.68±0.38                       |         |
| Moderate (n=86)                 | 4.11±12.41                      |         |
| Poor (n=31)                     | 2.75±8.63                       | 0.627   |
| Missing (n=20)                  |                                 |         |
| T stage                         |                                 |         |
| T1-2 (n=31)                     | 2.66±8.28                       |         |
| T3-4 (n=102)                    | 2.86±10.69                      | 0.499   |
| Missing (n=7)                   |                                 |         |
| N stage                         |                                 |         |
| N0 (n=81)                       | 1.89±3.38                       |         |
| N1 (n=47)                       | 6.55±17.40                      |         |
| N2 (n=9)                        | 1.29±2.44                       | 0.591   |
| Missing (n=3)                   |                                 |         |

SD, standard deviation

Supplementary Table S2: Association of clinical parameters and PSG9 levels in CRC tissues

|                         | PSG9 staining |                |                |                | $\chi^2$ | <i>P</i> value |
|-------------------------|---------------|----------------|----------------|----------------|----------|----------------|
|                         | -             | +              | ++             | +++            |          |                |
| Age(years)              |               |                |                |                |          |                |
| ≤66<br>(n=37)           | 1<br>(2.70%)  | 8<br>(21.62%)  | 13<br>(35.14%) | 15<br>(40.54%) | 0.76     | 0.782          |
| >66<br>(n=37)           | 1<br>(2.70%)  | 7<br>(18.92%)  | 13<br>(35.13%) | 16<br>(43.24%) |          |                |
| Sex                     |               |                |                |                |          |                |
| Female<br>(n=34)        | 0<br>(0%)     | 6<br>(17.65%)  | 15<br>(44.12%) | 13<br>(38.24%) | 1.01     | 0.315          |
| Male<br>(n=40)          | 2<br>(5.00%)  | 9<br>(22.50%)  | 11<br>(27.50%) | 18<br>(45.00%) |          |                |
| TNM                     |               |                |                |                |          |                |
| I-II<br>(n=50)          | 1<br>(2.00%)  | 11<br>(22.00%) | 18<br>(36.00%) | 20<br>(45.83%) | 0.09     | 0.762          |
| III-IV<br>(n=24)        | 1<br>(4.17%)  | 4<br>(16.67%)  | 8<br>(33.33%)  | 11<br>(45.83%) |          |                |
| Tumor size*             |               |                |                |                |          |                |
| ≤5 cm<br>(n=32)         | 1<br>(3.13%)  | 7<br>(21.88%)  | 13<br>(40.63%) | 11<br>(34.38%) | 0.13     | 0.718          |
| >5 cm<br>(n=41)         | 1<br>(2.44%)  | 8<br>(19.51%)  | 12<br>(29.27%) | 20<br>(48.78%) |          |                |
| Lymph node              |               |                |                |                |          |                |
| Negative<br>(n=52)      | 1<br>(1.92%)  | 11<br>(21.15%) | 18<br>(34.62%) | 22<br>(42.30%) | 0.00     | 0.974          |
| Positive<br>(n=22)      | 1<br>(4.55%)  | 4<br>(18.18%)  | 8<br>(36.36%)  | 9<br>(40.91%)  |          |                |
| Differentiation         |               |                |                |                |          |                |
| Well<br>(n=21)          | 2<br>(9.52%)  | 3<br>(14.28%)  | 7<br>(33.33%)  | 9<br>(42.86%)  | 0.01     | 0.914          |
| Moderate/Poor<br>(n=53) | 0<br>(0%)     | 12<br>(22.64%) | 19<br>(35.85%) | 22<br>(41.51%) |          |                |

\*one subject missing

Supplementary Table S3: Micro-vessels density (MVD) in CRC patients with low or high PSG9 levels

| PSG9 levels    | MVD            |                |                |                | $\chi^2$ | <i>P</i> value |
|----------------|----------------|----------------|----------------|----------------|----------|----------------|
|                | -              | +              | ++             | +++            |          |                |
| Low<br>(n=43)  | 14<br>(32.56%) | 12<br>(27.91%) | 7<br>(16.27%)  | 10<br>(23.26%) | 4.50     | 0.034          |
| High<br>(n=31) | 6<br>(19.35%)  | 5<br>(16.13%)  | 14<br>(45.16%) | 6<br>(19.36%)  |          |                |

Supplementary Table S4: Cox regression analysis factors associated with overall survival

| Variates                      | Univariate             |          | Multivariate           |          |
|-------------------------------|------------------------|----------|------------------------|----------|
|                               | HR (95% CI)            | <i>P</i> | HR (95% CI)            | <i>P</i> |
| Tissue PSG9<br>Low vs. High   | 2.803<br>(1.238-6.349) | 0.013    | 2.033<br>(0.856-4.830) | 0.108    |
| MVD<br>Low vs. High           | 2.382<br>(1.027-5.525) | 0.043    | 1.609<br>(0.631-4.100) | 0.319    |
| Age(years)<br>≤66 vs. >66     | 0.901<br>(0.411-1.974) | 0.794    |                        |          |
| Sex<br>Female vs. Male        | 1.967<br>(0.848-4.562) | 0.115    |                        |          |
| TNM<br>I-II vs. III-IV        | 4.208<br>(1.879-8.423) | <0.001   | 6.789<br>(1.292-35.68) | 0.024    |
| Tumor size<br>≤5cm vs. >5cm   | 2.955<br>(1.178-7.416) | 0.021    | 1.588<br>(0.549-4.422) | 0.405    |
| Lymph node<br>N vs. P*        | 3.234<br>(1.470-7.114) | 0.004    | 0.524<br>(0.109-2.524) | 0.524    |
| Differentiation<br>W vs. M/P# | 1.766<br>(0.663-4.707) | 0.255    |                        |          |

MVD, Microvessel Density; CI, confidence interval; HR, hazard ratio; \* N, negative; P, Positive; #, W, well; M, Moderate; P, Poor



Supplementary Table S5: Primers used in this study

| Genes                            |      | Sequence                        |
|----------------------------------|------|---------------------------------|
| <b>Primers for real time PCR</b> |      |                                 |
| <i>PSG9</i>                      | Up   | GCGAGGTGATGAGACTAGAGA           |
|                                  | Down | GGTTTTGGACAGCTGCAACC            |
| <i>VEGFA</i>                     | Up   | 5'-TGCTTCTGAGTGCCCAGGA-3'       |
|                                  | Down | 5'-TGGTTCAATGGTGTGAGGACATAG-3'  |
| <i>IGFBP-3</i>                   | Up   | 5'-CGCCAGGAAATGCTAGTGAG-3'      |
|                                  | Down | 5'-ATGTGTACACCCCTGGGACT-3'      |
| <i>PDGF-AA</i>                   | Up   | 5'-TCGATGAGATGGAGGGTCG-3'       |
|                                  | Down | 5'-ACCCGGACAGAAATCCAGTCT-3'     |
| <i>GM-CSF</i>                    | Up   | 5'-AATGTTTGACCTCCAGGAGCC-3'     |
|                                  | Down | 5'-GGTGATAGTCTGGGTTGCACA-3'     |
| <i>18S</i>                       | Up   | 5'-AAA CGG CTA CCA CAT CCA-3'   |
|                                  | Down | 5'-CAC CAG ACT TGC CCC TCC A-3' |
| <b>Primers for ChIP</b>          |      |                                 |
| <i>VEGFA</i>                     | Up   | 5'-ACCTAGCACCTCCACCAAAC-3'      |
|                                  | Down | 5'-AAACGCTCCAGGGAGCTTAC-3'      |
| <i>IGFBP-3</i>                   | Up   | 5'-TGTATGCCAGTTTCCCGAC-3'       |
|                                  | Down | 5'-CCGGGTCACCTTGTCGTCTA-3'      |
| <i>PDGF-AA</i>                   | Up   | 5'-GAAATGTGGGTGGAGGGTCC-3'      |
|                                  | Down | 5'-CCCAGCCTTCCTCTCTCCAT-3'      |
| <i>GM-CSF</i>                    | Up   | 5'-TGAGATGGATGCAGCCACAG-3'      |
|                                  | Down | 5'-GAGCCACCTTCCTGAGTGAC-3'      |

Supplementary Table S6: Antibodies used in this study

| Antibody                                            | Dilution   | Clone, source     | Company                                        |
|-----------------------------------------------------|------------|-------------------|------------------------------------------------|
| PSG9                                                | WB1:1000   | Rabbit polyclonal | Abcam, Cambridge, MA, USA                      |
| SMAD2/3                                             | WB1:200    | Mouse monoclonal  | Santa Cruz, CA, USA                            |
| SMAD4                                               | WB1:500    | Mouse monoclonal  | Santa Cruz                                     |
| GAPDH                                               | WB1:3000   | Mouse monoclonal  | Beyotime Biotechnology, Changsha, Hunan, China |
| $\beta$ -actin                                      | WB1:2000   | Mouse monoclonal  | Beyotime Biotechnology                         |
| LaminB1                                             | WB1:100    | Rabbit polyclonal | Cell Signaling Technologies, Danvers, MA, USA) |
| CD31                                                | IHC 1:200  | Rabbit monoclonal | Zhongshan Golden Bridge, Beijing, China        |
| Anti-c-Myc-tag                                      | WB 1:1000  | Rabbit polyclonal | CWBIO, Beijing, China                          |
| Anti-Flag-tag                                       | WB 1:500   | Mouse monoclonal  | CWBIO                                          |
| IRDye 680RD anti-mouse IgG (H+L)                    | WB 1:10000 | Goat              | LI-COR, NE, USA                                |
| IRDye 680RD anti-rabbit IgG (H+L)                   | WB 1:10000 | Goat              | LI-COR                                         |
| FITC-conjugated goat-anti-rabbit secondary antibody | IF 1:100   | Goat              | CUSABIO, Wuhan, China                          |
| Cy3-conjugated goat-anti-mouse secondary antibody   | IF 1:100   | Goat              | CUSABIO                                        |

Immunofluorescence, IF; Western blotting, WB; Immunohistochemistry, IHC.
